# Supplementary material for: Ultrasound- and Temperature-Induced Gelation of Gluconosemicarbazide Gelator in DMSO and Water Mixtures
Source: PubMed Central journal article supplement (PMC6318682; doi:10.3390/gels3020012), 2017-04-18
Supplement: gels-03-00012-s001.pdf [file gels-03-00012-s001.pdf]

# Ultrasound- and Temperature-Induced Gelation of Gluconosemicarbazide Gelator in DMSO and Water Mixtures

Himabindu M. and Aruna Palanisamy

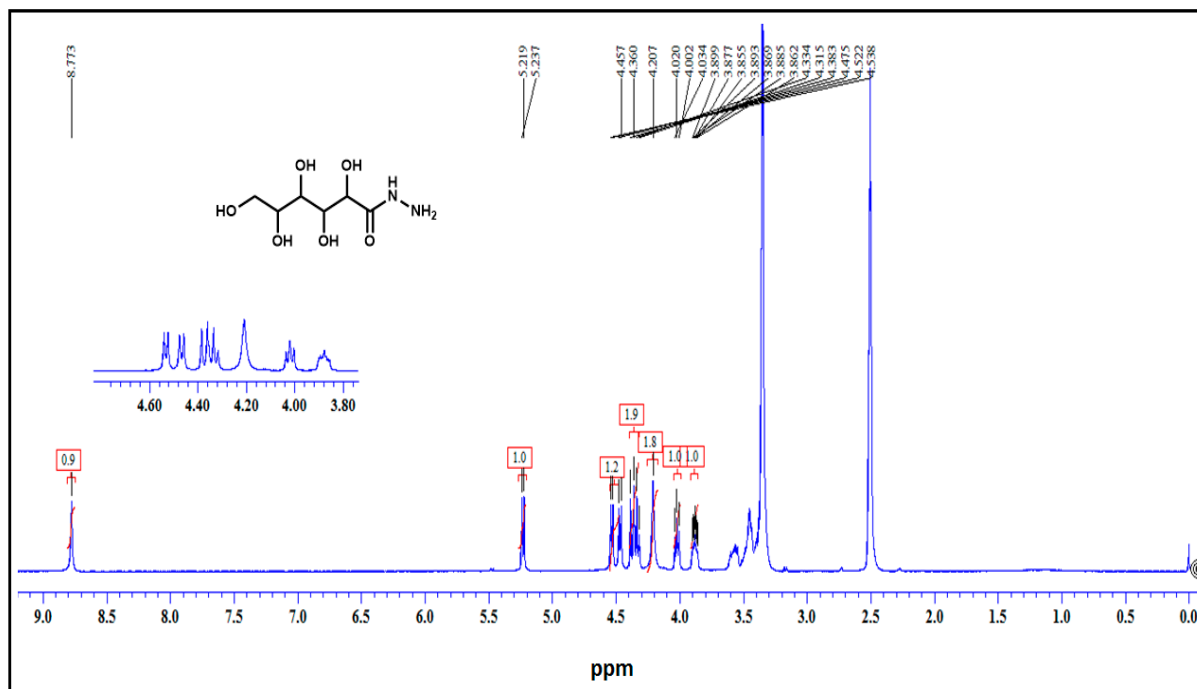

Figure S1. <sup>1</sup>H NMR spectrum of gluconohydrazide gelator.

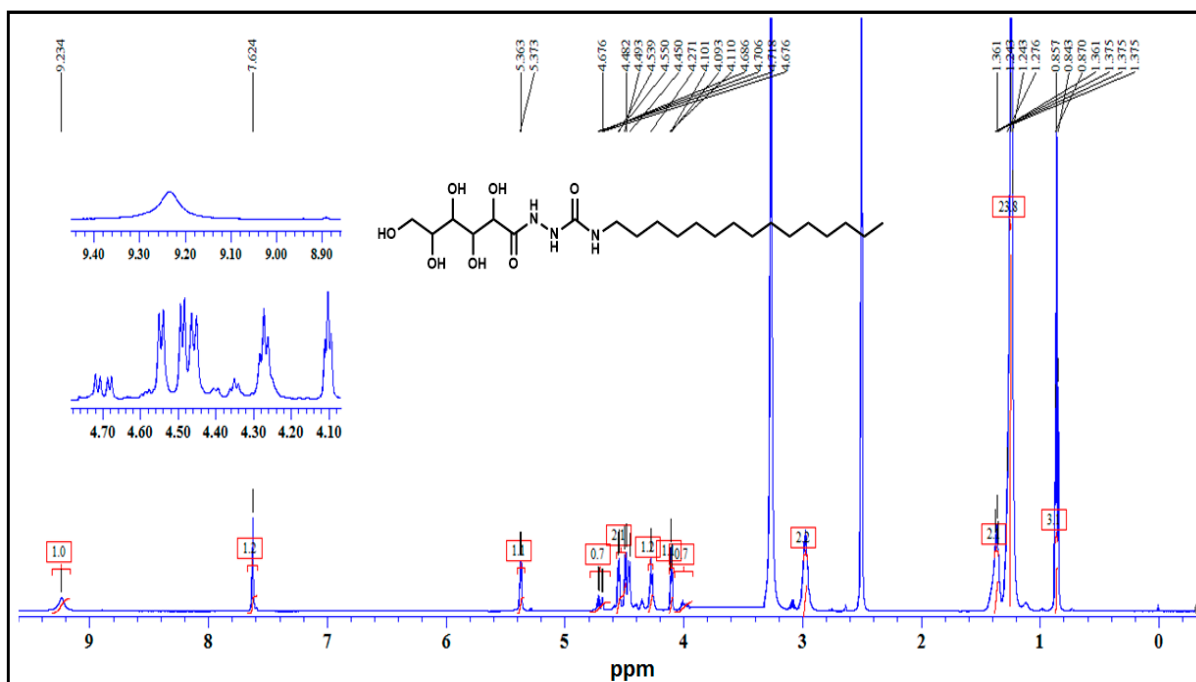

Figure S2. <sup>1</sup>H NMR spectrum of gluconosemicarbazide gelator.

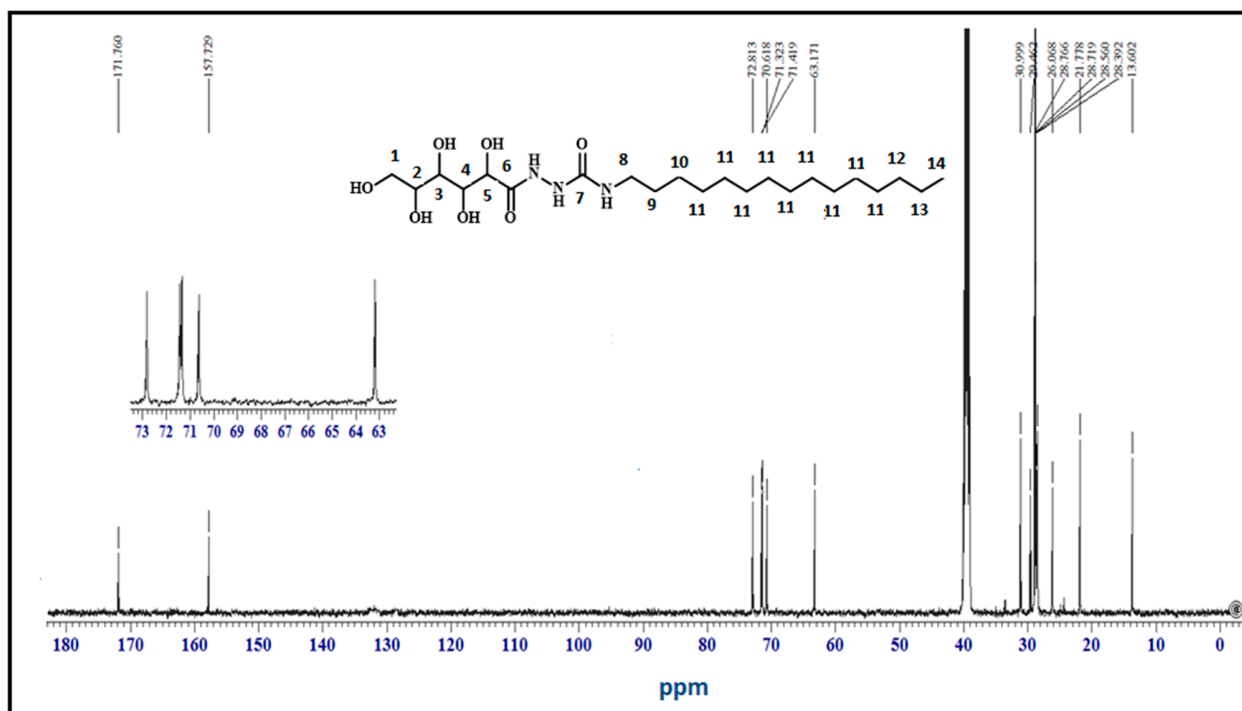

Figure S3. <sup>13</sup>C NMR spectrum of gluconosemicarbazide gelator in DMSO-d<sub>6</sub>.

**Table S1.** Gelation properties of C<sub>16</sub> gelator [solvent:water = 80:20 (*v/v*)].

| Serial No | Medium                  | MGC<br>(mg/mL) | Time of Gelation<br>(min) |
|-----------|-------------------------|----------------|---------------------------|
| 1         | DMSO + H <sub>2</sub> O | 25             | 30                        |
| 2         | NMP + H <sub>2</sub> O  | 20             | 30                        |
| 3         | DMF + H <sub>2</sub> O  | 25             | 30                        |
| 4         | DMSO                    | 60             | 360                       |
| 5         | DMAC + H <sub>2</sub> O | 30             | 50                        |
| 6         | Buffer PH-5.5 *         | 30             | 25                        |
| 7         | Buffer PH-7.4 *         | 32             | 120                       |
| 8         | Buffer PH-8.0 *         | 30             | 40                        |
| 9         | Buffer PH-12 *          | 35             | 30                        |

DMSO, dimethyl sulfoxide; DMF, dimethyl formamide; NMP, *N*-methyl pyrrolidone; DMAc, *N,N*-dimethyl acetamide; DMF, *N,N*-dimethyl formamide. \* Buffer solutions and their composition:

| Code          | Composition                                                                        |
|---------------|------------------------------------------------------------------------------------|
| Buffer PH-5.5 | 100 mL of 0.1 M Potassium hydrogenphthalate + 73.2 mL of 0.1 M sodium hydroxide    |
| Buffer PH-7.4 | 100 mL of 0.1 M potassium hydrogenphosphate + 78.2 mL of 0.1 M sodium hydroxide    |
| Buffer PH-8.0 | 100 mL of 0.1 M potassium hydrogenphosphate + 93.4 mL of 1 M sodium hydroxide      |
| Buffer PH-12  | 100 mL of 0.05 M disodium hydrogenphosphate + 53.8 mL of 0.1 M of sodium hydroxide |
